# Supplementary material
Source: PubMed Central journal article supplement (PMC5922275)

## 1 Supplementary Data

### 2 **Cell lines and primary cells**

3 Human myeloma cell lines (HMCL) from ATCC were maintained in RPMI 1640 (Lonza)/10%  
4 fetal calf serum (FCS, Labtech).

5 Patients gave informed consent using a protocol approved by the UCL/UCLH Committee for  
6 Ethics of Human Research. Patients had a bone marrow (BM) biopsy taken prior to therapy.  
7 Mononuclear cells (MNCs) from BM aspirates were obtained by density gradient centrifugation  
8 (Ficoll Paque, GE lifesciences) and stained directly for BCMA and TACI. BM MNCs were also  
9 CD138 selected (Miltenyl Microbeads) for cytotoxicity and co-culture assays.

### 10 **Cytogenetic analysis of primary MM cells**

11 Patients had iFISH analysis on CD138-selected cells at the time of bone marrow (BM)  
12 sampling. Adverse genetics was defined as the presence of t(4;14), t(14;16), t(14;20), 1q  
13 gain, 1p loss and/or del(17p)(>50%).  
14

### 15 **Flow cytometry**

16 BCMA/TACI quantification:  $2.5 \times 10^5$  cells were incubated with rat serum (Sigma) and anti-  
17 CD16/CD32 (in-house hybridoma supernatant clone 2.4G2) to reduce background staining.  
18 CD138 APC (Clone MI15) was then added with one of murine IgG2a PE Isotype control (clone  
19 MOPC-173), rat IgG2a PE Isotype control (clone RTK2758), anti-BCMA PE (clone 19F2) or  
20 anti-TACI PE (clone 1A1) at 4°C for 30 minutes before washing, resuspension in  
21 PBS/0.1%BSA/0.1%PFA (Santa Cruz) and analysis with BD QuantiBRITE™ beads. All  
22 antibodies from BioLegend unless otherwise specified. BD Fortessa was used for cell  
23 acquisition and data was analysed using FlowJo\_V10. Antibodies bound per cell (ABC) was  
24 then calculated by subtracting ABC of relevant isotype control. Calculated expression levels  
25 of greater than 100 ABC was taken as positive.  
26

27 CAR T-cells: Transduced cells were stained with CD34 PE (clone QBEnd10, R&D) to detect  
28 RQR8 and APRIL biotin (clone 53E11, BioLegend) followed by Streptavidin APC (AbD  
29 Serotec) and transduction efficiency refer to RQR8+APRIL+ events.  
30

31 FACS based cytotoxicity assays: Targets were stained with Efluor780 viability dye  
32 (eBioscience) and CD4 PE, CD8 PB and CD3 APC for SUPT1 targets or CD138 APC for  
33 myeloma cells with Flow-Check™ beads (Beckman Coulter). Viable SUPT1 or myeloma cells  
34 determined as live/single/CD3-/CD4+/CD8+ or live/single/CD138+ events respectively.  
35 Effector proliferation was determined by staining for RQR8.

1  
2  
3  
4  
5  
6  
7  
8  
9  
10  
11  
12  
13  
14  
15  
16  
17  
18  
19  
20  
21  
22  
23  
24  
25  
26  
27  
28  
29  
30  
31  
32  
33  
34  
35  
36

## **Real-time qPCR to quantitate BCMA and TACI transcript copies**

Gene expression was performed by Asterand Bioscience (XpressWay® profile) testing 72 non-diseased tissue types, each from 3 different donors. Beta-actin cDNA quantification served as a control. Primers listed in Table S2.

## **Assessing BCMA and TACI binding to membrane bound APRIL**

SUPT1 cells were transduced with RD114-pseudotyped viral supernatant to express truncated APRIL and CD34 separated by an autocatalytic 2A peptide (ie APRIL.2A.CD34)<sup>1</sup>. Then 0.5x10<sup>6</sup> SUPT1 cells were washed and incubated with 500µl of supernatant from 293T cells transfected with GeneJuice® (Novagen) to secrete BCMA-muFc or TACI-muFc. After 30 minutes at room temperature, cells were washed and stained with anti-muFc FITC (Jackson) and CD34 APC (clone QBend10 R&D).

## **Assessing BCMA and TACI binding to truncated APRIL by surface plasmon resonance**

Protein production and purification: Recombinant APRIL containing an N terminal FLAG™ Tag and a C-terminal hinge was expressed in 293T cells. Both constructs contained a poly-histidine tag at the extreme C-terminus. Supernatant from transfected 293T cells were purified using TALON™ metal affinity chromatography. A Hi-trap crude TALON column was equilibrated in binding buffer, 300 mM NaCl, 50 mM sodium phosphate, pH 7.4. Supernatant was applied to the column using an Akta™ Purifier system at a flow rate of 1 ml/min<sup>-1</sup>. Following application of supernatant, the column was washed with 10 column volumes of wash buffer 1, 5 mM imidazole, 300 mM NaCl, 50 mM sodium phosphate, followed by 10 column volumes of wash buffer 2, 10 mM imidazole, 300 mM NaCl, 50 mM sodium phosphate, pH 7.4. Bound protein was eluted using elution buffer, 150 mM imidazole, 300 mM NaCl, 50 mM sodium phosphate, pH 7.4. The desired fractions were pooled and dialysed against PBS (Sigma) overnight. All purification steps were carried out at 4°C.

Surface plasmon resonance: Sensograms were obtained on a BIAcore™ T200 instrument by capturing His tagged APRIL on a CM5 Chip (GE Healthcare: 29104988) functionalised with an anti-His antibody (GE Healthcare). BCMA and TACI (Peprotech) were injected over the sensor surface at concentrations ranging from 1 – 300 nM. The sensor surface was regenerated between each injection with a short pulse of 3M MgCl<sub>2</sub>. In each experiment flow cell 1 was unmodified and used as a reference subtraction. A sensogram of buffer alone was used as a double reference subtraction to factor for drift. Data were fit to a 1:1 langmuir binding model.

## 1 **Cytotoxicity assays**

2 All effector cells were CD56 depleted (Miltenyl) prior to co-culture. Effector to target (E:T) ratios  
3 refer to ratio of ACAR+ T-cells to targets throughout. Four hour <sup>51</sup>Cr release assays were  
4 performed by incubating 5x10<sup>3</sup> chromium-labelled targets with ACAR T-cells at E:T ratios  
5 indicated.

6 With cell lines, FACS based cytotoxicity assays were performed by plating targets at  
7 0.5x10<sup>6</sup>/ml and adding equal volumes of ACAR T-cells at the relevant concentration.  
8 Percentage cytolysis was calculated relative to viable targets in media control. Interferon  
9 gamma (IFNG) release was assessed using a BioLegend IFNG ELISA Max kit. FACS analysis  
10 at 48 hours.

11 ACAR transduced PBMCs were labelled with 5uM Cell Trace Violet (Thermo Fisher) according  
12 to the manufacturer's instructions and co-cultured 1:1 ratio with SUPT1 targets. The cells were  
13 harvested at D+4 and stained with CD3, CD8 and RQR8 as well as 7-AAD before analysis by  
14 FACS. Percentage of ACAR cells proliferated determined gating on live/CD3+/RQR8+ cells  
15 compared to on co-culture with SUPT1<sup>NT</sup>.

16 CD138-selected primary myeloma cells were cultured in RPMI 1640/20% pooled patient  
17 plasma (PPP)<sup>2</sup>. Percentage cytolysis was calculated relative to viable tumour cells on co-  
18 culture with PBMC NT. Blocking experiments were performed using anti-BCMA antibody  
19 S307118G03, mulgG2a Fc Protein (AcroBiosystems).

20

## 21 **Engineering BCMA and TACI expressing SUPT1 targets**

22 SUPT1 cells were transduced to express BCMA or TACI and green fluorescent protein (GFP)  
23 separated by an in-frame foot-and-mouth-like 2A peptide, TaV<sup>1</sup> (ie BCMA.2A.GFP or  
24 TACI.2A.GFP). SUPT1<sup>BCMA</sup> and SUPT1<sup>TACI</sup> were then sorted into discrete populations on a BD  
25 FACSaria Fusion. For the in vivo escape model, SUPT1-BCMA3 and SUPT1-TACI2 were the  
26 retrovirally transduced with SFG.FLuc.2A.RQR8 and SFG.FLuc.2A.HA in a second reaction  
27 respectively and then FACS sorted to a minimum of 90% FLuc purity.

## 28 **Production of S307118G03**

29 Variable Heavy and light domains of anti-BCMA antibody S307118G03 have been previously  
30 described<sup>3</sup>. Variable sequences were cloned into the AbVec-mIgG2a and AbVec-mIgK  
31 vectors<sup>4</sup>. ExpiCHO<sup>TM</sup> cells (Thermo Fisher) were split to a density of 6x10<sup>6</sup> cells/ml in ExpiCHO  
32 medium four hours before transfection with Expifectamine reagent (Thermo Fisher). Secreted  
33 antibodies were purified by affinity chromatography, HiTRAP<sup>TM</sup> MabSelect SuRe<sup>TM</sup> (GE  
34 Healthcare), followed by size exclusion chromatography, Superdex S200 (GE Healthcare).  
35 Protein purity was confirmed by SDS PAGE electrophoresis.

## 1 **Immunohistochemistry**

2 Immunohistochemistry was performed on a Leica BOND-III platform and used the  
3 BOND Polymer Refine Detection kit. CD138 (Clone MI15, Dako) was diluted 1/200 in Primary  
4 Antibody Diluent BOND. The tissue was incubated in Epitope Retrieval Solution 1  
5 (ER2) BOND for 20 minutes and stained using the 15, 8, 8 protocol. Sections were examined  
6 using an Olympus BX51 microscope and photographed using an Olympus DP20 microscope  
7 camera.

8

## 9 **BM Sera levels of APRIL, BCMA and TACI**

10 Sera from the BM aspirates from patients with myeloma were obtained. BM sera non-myeloma  
11 patients were obtained from 7 further patients. Four of these served as controls for sAPRIL  
12 and sTACI assays and were obtained from patients being investigated for myeloproliferative  
13 disease (n=2, JAK2 mutation V617F, calreticulin negative) or myelodysplasia (n=1) or mild  
14 neutropenia (n=1). A further 3 samples served as controls for the sBCMA assays and were  
15 BM aspirates obtained to investigate myeloproliferative disease (n=1) or myelodysplasia  
16 (n=2). These BM sera samples were then analysed by ELISA for sAPRIL (BioLegend), sTACI  
17 (Raybio) and sBCMA (R&D) as per manufacturer's instructions.

18

## 19 **ACAR blocking or activation by soluble APRIL, BCMA and TACI**

20 Blocking of ACAR mediated cytotoxicity assessed by performing FACS based cytotoxicity as  
21 described above in the presence or absence of soluble APRIL, BCMA or TACI (all from  
22 Peprotech). Activation was performed by incubating T-cells at a concentration of  $2.5 \times 10^5$ /ml  
23 in the presence of soluble APRIL/BCMA/TACI and measuring IFNG release at 24 hours by  
24 ELISA.

25

## 26 **In vivo model**

27 This work was performed under a United Kingdom Home Office-approved project license and  
28 in accordance with institutional policies. Six to eight-week-old, female, NSG mice (NOD.Cg-  
29 *Prkdc<sup>scid</sup> Il2rg<sup>tm1Wjl</sup>/SzJ*) were purchased from Charles River.  $10 \times 10^6$  or  $3.5 \times 10^6$  Firefly  
30 luciferase (Fluc) expressing MM.1s cells or SUPT1 cells (comprising a mix of SUPT1<sup>BCMA</sup> and  
31 SUPT1<sup>TACI</sup> at 4:1 ratio), respectively, were injected by tail vein injection at D0. Disease burden  
32 was assessed by bioluminescence imaging (BLI) where mice were anesthetized, and then  
33 imaged using a Xenogen IVIS Imaging System (Perkin Elmer Life Sciences) following  
34 intraperitoneal injection of D-luciferin.

35

36

37

## 1 **In vivo screen for ACAR toxicity**

2 After sacrifice of NSG mice (NOD.Cg-*Prkdc*<sup>scid</sup> *Il2rg*<sup>tm1Wjl</sup>/SzJ), organs were resected from 6/6  
3 tumour only mice, 6/6 animals who received ACAR T-cells and 5 control animals (Charles  
4 River), formalin fixed and paraffin embedded before sections stained with haematoxylin and  
5 eosin and examined by an independent histopathologist. Tissues examined were eyes, optic  
6 nerves, Harderian glands, skin, mammary gland, skeletal muscle, femur with BM and stifle  
7 joint, sternum with BM, sciatic nerves, liver, spleen, pancreas, mesenteric lymph nodes,  
8 stomach, duodenum, jejunum, ileum, gut-associated lymphoid tissue (GALT), caecum, colon,  
9 rectum, gall bladder, adrenal gland, kidney, ureters, urinary bladder, ovaries, uterus including  
10 cervix, oviducts, vagina, clitoral, salivary gland, mandibular lymph nodes, thymus, lungs with  
11 bronchi/bronchioles, heart, aorta, trachea, oesophagus, thyroids, parathyroids, larynx, tongue,  
12 pituitary gland, brain, spinal cord cervical, thoracic and lumbar, lacrimal glands.

13

## 14 **Statistics**

15 P values <0.05 were considered significant. Statistical tests were used as indicated and  
16 calculated using Prism version 6.0 (Graphpad Software).

17

## 18 **References**

- 19 1. Donnelly ML, Hughes LE, Luke G, et al. The 'cleavage' activities of foot-and-mouth  
20 disease virus 2A site-directed mutants and naturally occurring '2A-like' sequences. *J Gen  
21 Virol.* 2001;82(Pt 5):1027-1041.
- 22 2. Quinn J, Glassford J, Percy L, et al. APRIL promotes cell-cycle progression in  
23 primary multiple myeloma cells: influence of D-type cyclin group and translocation status.  
24 *Vol.* 117; 2011.
- 25 3. Tai YT, Mayes PA, Acharya C, et al. Novel anti-B-cell maturation antigen antibody-  
26 drug conjugate (GSK2857916) selectively induces killing of multiple myeloma. *Blood.*  
27 2014;123(20):3128-3138.
- 28 4. Di Niro R, Mesin L, Raki M, et al. Rapid generation of rotavirus-specific human  
29 monoclonal antibodies from small-intestinal mucosa. *J Immunol.* 2010;185(9):5377-5383.
- 30 5. Hombach A, Hombach AA, Abken H. Adoptive immunotherapy with genetically  
31 engineered T cells: modification of the IgG1 Fc 'spacer' domain in the extracellular moiety of  
32 chimeric antigen receptors avoids 'off-target' activation and unintended initiation of an innate  
33 immune response. *Gene Ther.* 2010;17(10):1206-1213.
- 34 6. Carpenter RO, Evbuomwan MO, Pittaluga S, et al. B-cell maturation antigen is a  
35 promising target for adoptive T-cell therapy of multiple myeloma. *Clin Cancer Res.*  
36 2013;19(8):2048-2060.

1 7. Ali SA, Shi V, Maric I, et al. T cells expressing an anti-B-cell-maturation-antigen  
2 chimeric antigen receptor cause remissions of multiple myeloma. *Blood*. 2016.

### 3 Supp Figure Legends

4 **Table S1. BCMA and TACI expression levels on primary myeloma cells from 50 patients**  
5 **determined by FACS.** Bone marrow mononuclear cells were stained with CD138 APC  
6 (displayed on y-axis) and BCMA PE, TACI PE or their respective isotype controls, mIgG2a PE  
7 and rIgG2a PE (x-axis). Antigen densities of BCMA and TACI on CD138+ tumour cells (gated)  
8 were then quantified using QuantiBRITE™ beads and subtracting antibodies bound per cell  
9 (ABC) of isotype controls.

### 10 **Table S2. Primers for RT-PCR**

11

12 **S1. BCMA and TACI expression of primary myeloma cells (A)** Surface Antigen expression  
13 levels on myeloma tumour cells was determined by staining BM MNCs with CD138 and BCMA  
14 PE, TACI PE or their respective isotype controls. Example histogram (Patient #7) showing  
15 fluorescence of CD138+ gated cells stained for (i)BCMA (blue) or (ii)TACI (red) compared to  
16 their relevant isotype controls (empty) superimposed onto QuantiBRITE™ beads (grey). (B) In  
17 a small number of patients, CD138+ tumour cells were stained with TACI streptavidin and  
18 BCMA PE to demonstrate co-expression of both receptors on myeloma cells. (C) Expression  
19 of BCMA and TACI on primary myeloma cells. The patient samples with a higher antigen  
20 density of TACI than BCMA highlighted as empty circles (n=50, r=0.27, p=0.054 by  
21 Spearman). (D) Tumour BCMA and TACI expression from patients at diagnosis (D, n=27) or  
22 relapsed and refractory (R, n=23) disease. (E) Tumour BCMA and TACI expression in patients  
23 with standard (S, n=17) and poor risk (P, n=25) genetic lesions. The following were included  
24 under the definition of poor genetic risk: t(4;14), t(14;16), t(14;20), 1q gain, 1p loss and/or  
25 del(17p)(>50%). Median shown, \*p<0.05 by Mann Whitney.

26 **Figure S2. BCMA and TACI transcripts in normal tissue (A)** qRT-PCR of BCMA and TACI  
27 transcripts in normal tissues displayed as mean tissue expression of BCMA and TACI (n=3).  
28 Mean±SD shown.

29 **Figure S3. Membrane bound APRIL binds BCMA and TACI (A)** SUPT1 cells were  
30 transduced with APRIL fused to a CD28 transmembrane (tm) domain via an IgG1 hinge, CD8  
31 stalk or Fc spacer (as modified by Hombach<sup>5</sup>) as well as CD34 as a marker gene which was  
32 cloned downstream of an internal ribosome entry site (IRES) (ie CD34.IRES.APRIL). (i) These  
33 cells were then incubated for 30 mins with supernatant from 293T cells transfected to secrete  
34 BCMA-muFc or TACI-muFc. Cells were then washed and stained for anti-CD34 APC (marker

1 gene) and anti-muFc FITC. Membrane bound GD2 served as a negative control. Binding to  
2 (ii)BCMAmuFc and (iii)TACImuFc quantified by the MFI of the gated cells. (B) Kinetic affinity  
3 determination for the binding between truncated APRIL and (i)BCMA and (ii)TACI by surface  
4 plasmon resonance. A multi-cycle-kinetics approach was used for the determination of  
5 association and dissociation rates listed in inset table.

6 **Figure S4. Proliferation of ACAR on co-culture with BCMA and TACI expressing SUPT1**  
7 **cells.** ACAR transduced PMNCs were labelled with Cell Trace Violet prior to co-culture (1:1)  
8 with SUPT1<sup>NT</sup>, SUPT1<sup>BCMA</sup> or SUPT1<sup>TACI</sup> prior to FACS at D+4. Percentage of ACAR positive  
9 cells proliferated determined by gating on live/singlet/CD3+/RQR8+ events (ACAR transduced  
10 PBMCs from 2 donors shown).

11 **Figure S5. ACAR mediated cytotoxicity of SUPT1<sup>BCMA</sup>, SUPT1<sup>TACI</sup> and human myeloma cell**  
12 **lines.** (A) ACAR-H and CD8 spacer variants were also tested against SUPT1 targets  
13 expressing a wide range of (i)BCMA and (ii)TACI targets in a 4 hour <sup>51</sup>Cr release assay. E:T  
14 ratio of 16:1 shown. Percentage specific cytotoxicity calculated by subtracting background kill  
15 observed on incubation with NT PBMC. (B) Tumour kill(i) was demonstrated on co-culture of  
16 ACAR-H and several human myeloma cell lines (1:1) expressing a range of BCMA and TACI  
17 levels(ii). (C) PBMCs transduced with ACAR(n=5) and a BCMA targeting CAR (differing to  
18 the ACAR in its exodomain consisting of the 11-D-5-3 ScFv<sup>6,7</sup> and CD8 spacer) were co-  
19 cultured and tested against (i)MM.1s and (ii)U266 at reducing E:T ratios and target cytotoxicity  
20 determined at 48 hours by FACS. There was no statistical significance between the ACAR  
21 and BCMA CAR constructs at any of the E:T ratios tested. Mean±SEM shown, \*=p<0.05,  
22 \*\*=p<0.01, \*\*\*=p<0.001 by *t* test.

23 **Figure S6. ACAR mediated cytotoxicity and activation in the presence of soluble APRIL,**  
24 **BCMA and TACI and levels in BM sera:** (A) Sera obtained from bone marrow aspirates from  
25 myeloma patients(n=10) and control donors (n=4 for sAPRIL and sTACI and n=3 for sBCMA)  
26 were assayed for soluble APRIL, BCMA and TACI. While BM levels of sBCMA and sTACI  
27 were raised in MM patients (median 294 vs 35ng/ml and 27 vs 1.2ng/ml in control BM  
28 respectively), levels of sAPRIL were reduced compared to controls (median 6.2 vs 18ng/ml  
29 respectively). Medians indicated on dot plots. (B) ACAR-H transduced T-cells from multiple  
30 donors were co-cultured with MM1.s cells at low E:T ratios indicated in the presence of soluble  
31 APRIL (n=3), BCMA(n=6) and TACI(n=3). Mean kill (at 48 hours)±SEM shown, (C) IFNG  
32 release by ACAR T-cells on incubation with soluble APRIL (50ng/ml), BCMA(1000ng/ml),  
33 TACI(200ng/ml) or co-culture with MM.1s cells (1:1) for 24 hours (n=3). Mean±SEM shown  
34 \*=p<0.05, \*\*=p<0.01, \*\*\*=p<0.001 by *t* test.

1 **Figure S7. ACAR-H mediated cytotoxicity of SUPT1 cells expressing murine BCMA and**  
2 **TACI:** (A)SUPT1 cells expressing human and murine isoforms of BCMA and TACI were co-  
3 cultured with ACAR-H transduced T-cells (E:T ratio 4:1, n=3) and cytotoxicity at 72 hours  
4 determined by FACS. Mean±SEM shown, \*\*\*=p<0.001 by *t* test. (B) Haematoxylin & eosin  
5 stained sections obtained from mice treated with ACAR failed to show ACAR mediated tissue  
6 cytotoxicity. Sections of organs indicated from single mouse from NT, EGFRvIII and ACAR  
7 treated cohorts shown.

8 **Figure S8. T-cell persistence in murine model of antigen escape.** Twenty-one NSG mice  
9 were injected with SUPT1 cells expressing either BCMA or TACI (at a ratio of 80% and 20%)  
10 and then treated with NT, ACAR or BCMA CAR T-cells (n=7 in each cohort). At D+13, the  
11 experiment was terminated and bone marrow T-cells defined as live/singlet/mCD11b-  
12 /CD2+/CD4+ or CD8+ events and normalised with Flow-Check™ beads.

13



Table S1

| Patient | mIgG2a                                                                              | rIgG2a                                                                              | BCMA                                                                                | TACI                                                                                 | Antigen density           |
|---------|-------------------------------------------------------------------------------------|-------------------------------------------------------------------------------------|-------------------------------------------------------------------------------------|--------------------------------------------------------------------------------------|---------------------------|
| 1       | 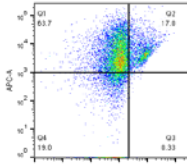   |    |    |    | BCMA: 7728<br>TACI: 1213  |
| 2       |    |    |    |    | BCMA: 1224<br>TACI: 563   |
| 3       |    |    |    |    | BCMA: 2831<br>TACI: 830   |
| 4       |    |    |    |    | BCMA: 344<br>TACI: 251    |
| 5       |   |   |   |   | BCMA: 1962<br>TACI: 1391  |
| 6       |  |  |  |  | BCMA: 379<br>TACI: 36     |
| 7       |  |  |  |  | BCMA: 5099<br>TACI: 21301 |
| 8       |  |  |  |  | BCMA: 1886<br>TACI: 2331  |
| 9       |  |  |  |  | BCMA: 5538<br>TACI: 107   |

Table S1 Cont'd

| Patient | mlgG2a | rlgG2a | BCMA | TACI | Antigen density         |
|---------|--------|--------|------|------|-------------------------|
| 10      |        |        |      |      | BCMA: 1652<br>TACI: 512 |
| 11      |        |        |      |      | BCMA: 413<br>TACI: 432  |
| 12      |        |        |      |      | BCMA: 1051<br>TACI: 64  |
| 13      |        |        |      |      | BCMA: 1226<br>TACI: 997 |
| 14      |        |        |      |      | BCMA: 691<br>TACI: 0    |
| 15      |        |        |      |      | BCMA: 1426<br>TACI: 333 |
| 16      |        |        |      |      | BCMA: 2006<br>TACI: 0   |
| 17      |        |        |      |      | BCMA: 3051<br>TACI: 192 |
| 18      |        |        |      |      | BCMA: 1903<br>TACI: 264 |

Table S1 Cont'd

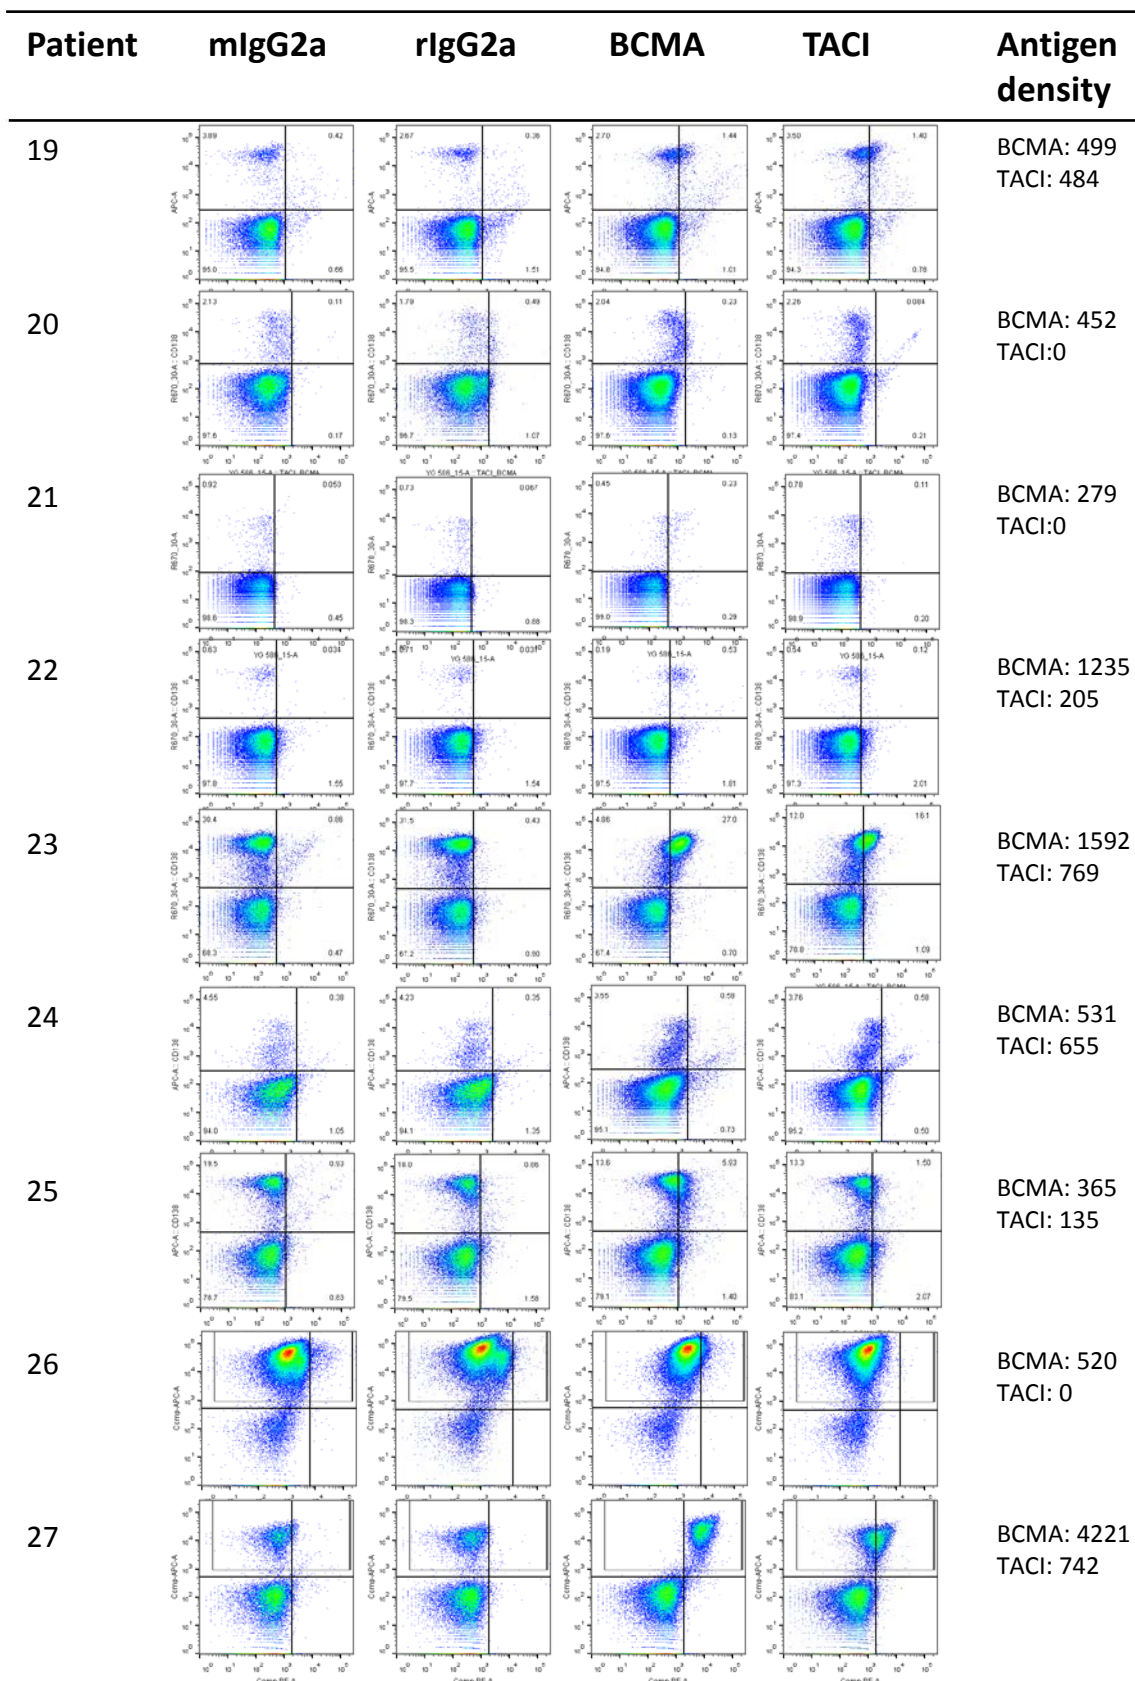

Table S1 Cont'd

| Patient | mlgG2a | rlgG2a | BCMA | TACI | Antigen density          |
|---------|--------|--------|------|------|--------------------------|
| 28      |        |        |      |      | BCMA: 361.8<br>TACI: 262 |
| 29      |        |        |      |      | BCMA: 413<br>TACI: 170   |
| 30      |        |        |      |      | BCMA: 2390<br>TACI: 386  |
| 31      |        |        |      |      | BCMA: 118<br>TACI: 467   |
| 32      |        |        |      |      | BCMA: 8323<br>TACI: 345  |
| 33      |        |        |      |      | BCMA: 783<br>TACI: 364   |
| 34      |        |        |      |      | BCMA: 203<br>TACI: 571   |
| 35      |        |        |      |      | BCMA: 403<br>TACI: 0     |
| 36      |        |        |      |      | BCMA: 745<br>TACI: 0     |

Table S1 Cont'd

| Patient | mIgG2a                                                                              | rlgG2a                                                                              | BCMA                                                                                | TACI                                                                                 | Antigen density          |
|---------|-------------------------------------------------------------------------------------|-------------------------------------------------------------------------------------|-------------------------------------------------------------------------------------|--------------------------------------------------------------------------------------|--------------------------|
| 37      | 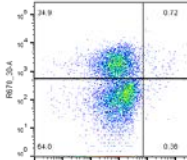   |    |    |    | BCMA: 420<br>TACI:0      |
| 38      |    |    |    |    | BCMA: 1071<br>TACI: 101  |
| 39      |    |    |    |    | BCMA: 2651<br>TACI: 234  |
| 40      |    |    |    |    | BCMA: 888<br>TACI: 1081  |
| 41      |   |   |   |   | BCMA: 105<br>TACI: 647   |
| 42      |  |  |  |  | BCMA: 345<br>TACI: 265   |
| 43      |  |  |  |  | BCMA: 1953<br>TACI: 1747 |
| 44      |  |  |  |  | BCMA: 2088<br>TACI:159   |
| 45      |  |  |  |  | BCMA: 2208<br>TACI: 396  |

Table S1 Cont'd

| Patient | mIgG2a | rlgG2a | BCMA | TACI | Antigen density         |
|---------|--------|--------|------|------|-------------------------|
| 46      |        |        |      |      | BCMA: 305<br>TACI: 566  |
| 47      |        |        |      |      | BCMA: 1220<br>TACI: 334 |
| 48      |        |        |      |      | BCMA: 1883<br>TACI: 152 |
| 49      |        |        |      |      | BCMA: 867<br>TACI: 259  |
| 50      |        |        |      |      | BCMA: 202<br>TACI: 154  |

**Table S2**

|                                    | <b>TACI</b>                                           | <b>BCMA</b>                                          |
|------------------------------------|-------------------------------------------------------|------------------------------------------------------|
| <b>Protein Accession Number</b>    | O14836                                                | Q02223                                               |
| <b>Nucleotide Accession Number</b> | NM_012452                                             | NM_001192                                            |
| <b>Forward primer</b>              | GCAAGGAGCAAGGCAAGTTCT                                 | AAGAGCAAACCGAAGGTCGA                                 |
| <b>Reverse primer</b>              | TGAGCTCTGGTGAAGGTTAC                                  | GGTTGCGCCTTCTCCAT                                    |
| <b>Probe</b>                       | CTGCATCAGCTGTGCCTCCATCTGTG                            | TCTGACCATTGCTTCCACTCCCAGC                            |
| <b>SwissProt Name</b>              | TNFRSF13B. Synonyms: TACI                             | TNFRSF17. Synonyms: BCM, BCMA.                       |
| <b>SwissProt Description</b>       | Tumor necrosis factor receptor superfamily member 13B | Tumor necrosis factor receptor superfamily member 17 |

Figure S1

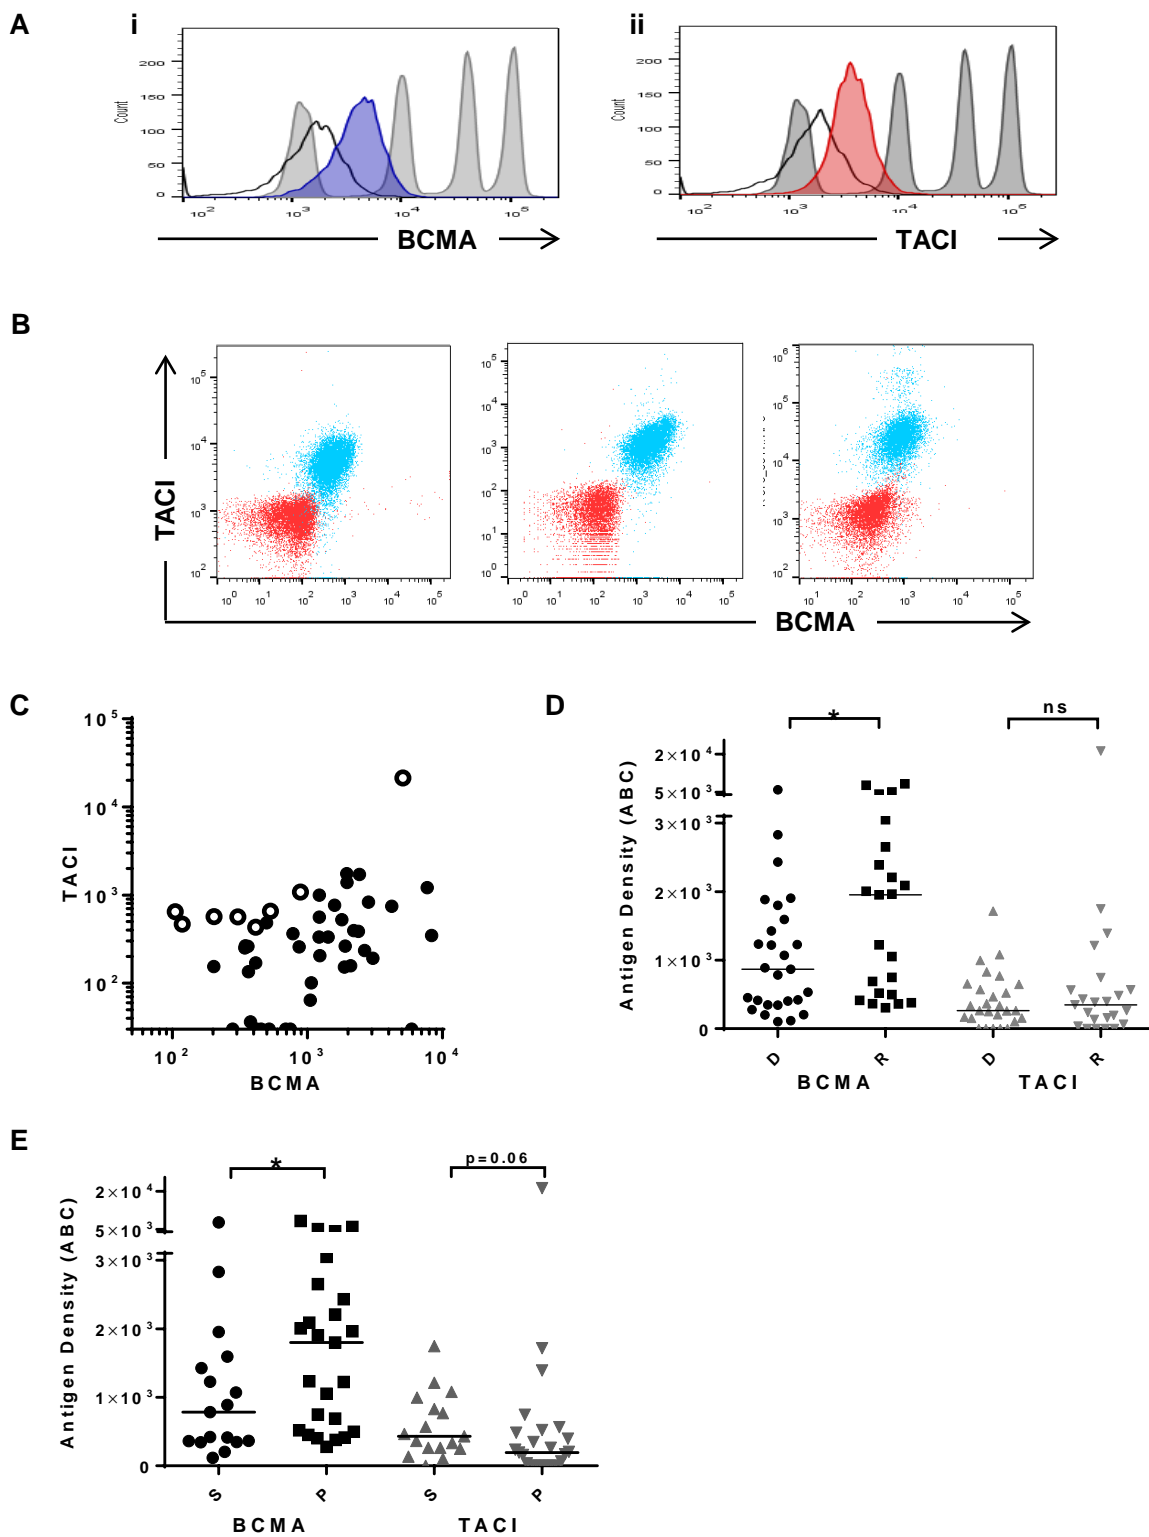



Figure S2

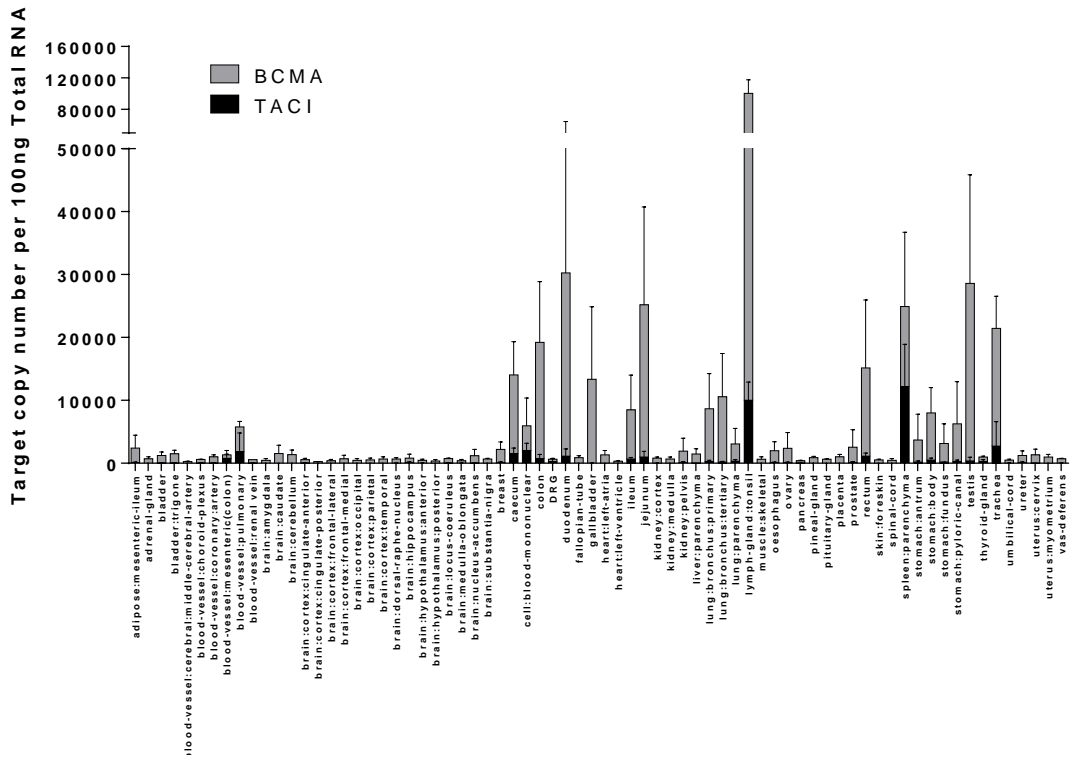

Figure S3

A i

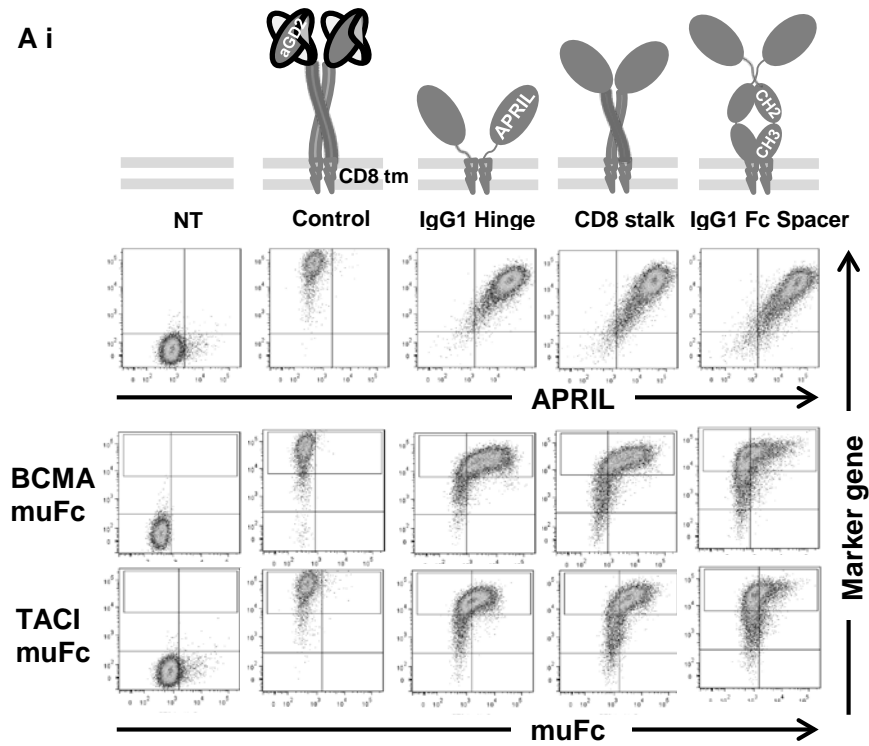

ii

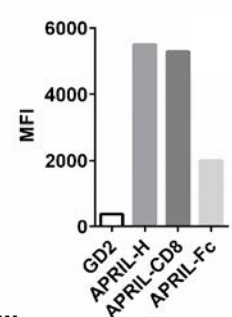

iii

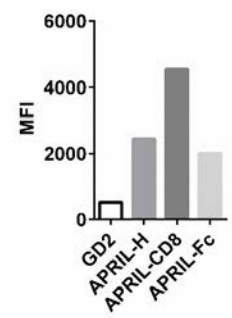

B i

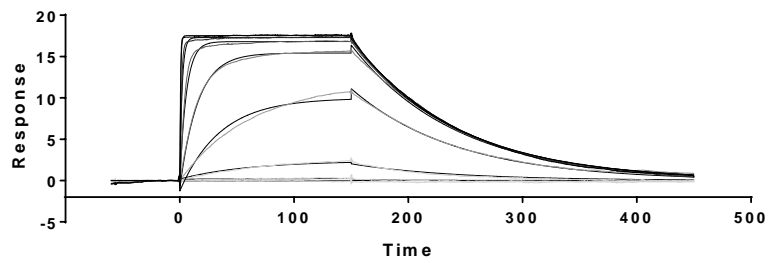

ii

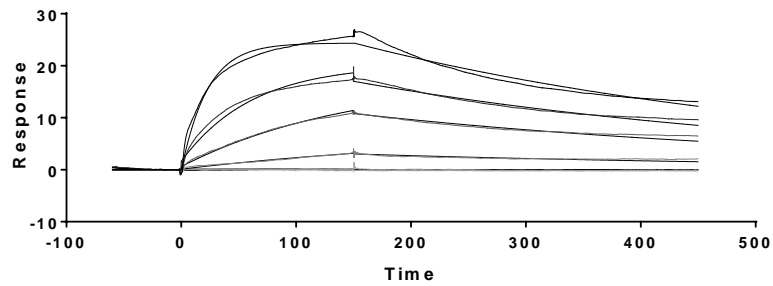

| Ligand | $K_D$ (nM) | $K_{on}$ ( $M s^{-1}$ ) | $K_{off}$ ( $s^{-1}$ ) |
|--------|------------|-------------------------|------------------------|
| BCMA   | 2.99       | $4.14E+06$              | 0.0123                 |
| TACI   | 5.63       | $3.87E+05$              | 0.0020                 |

Figure S4

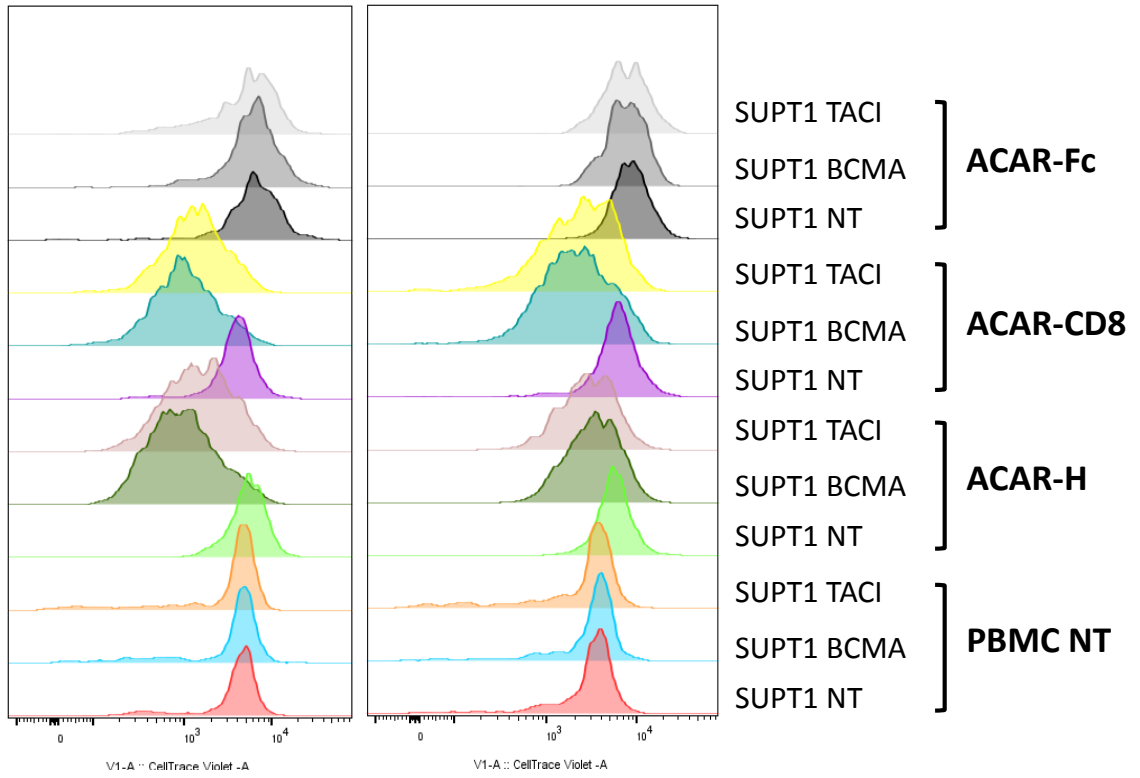

**Figure S5**

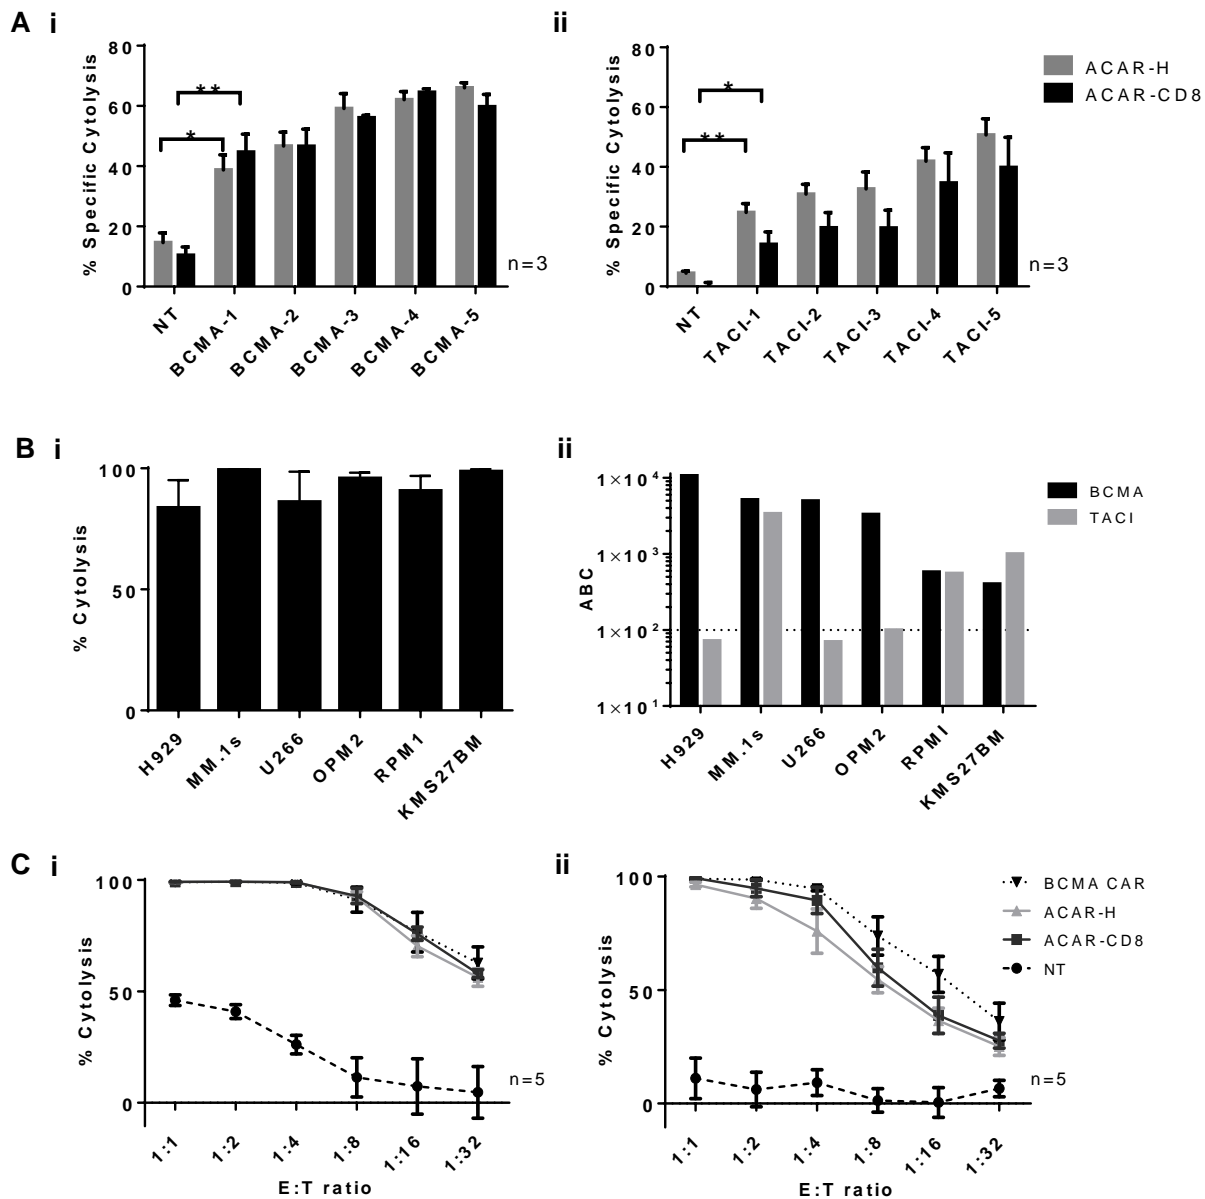

Figure S6

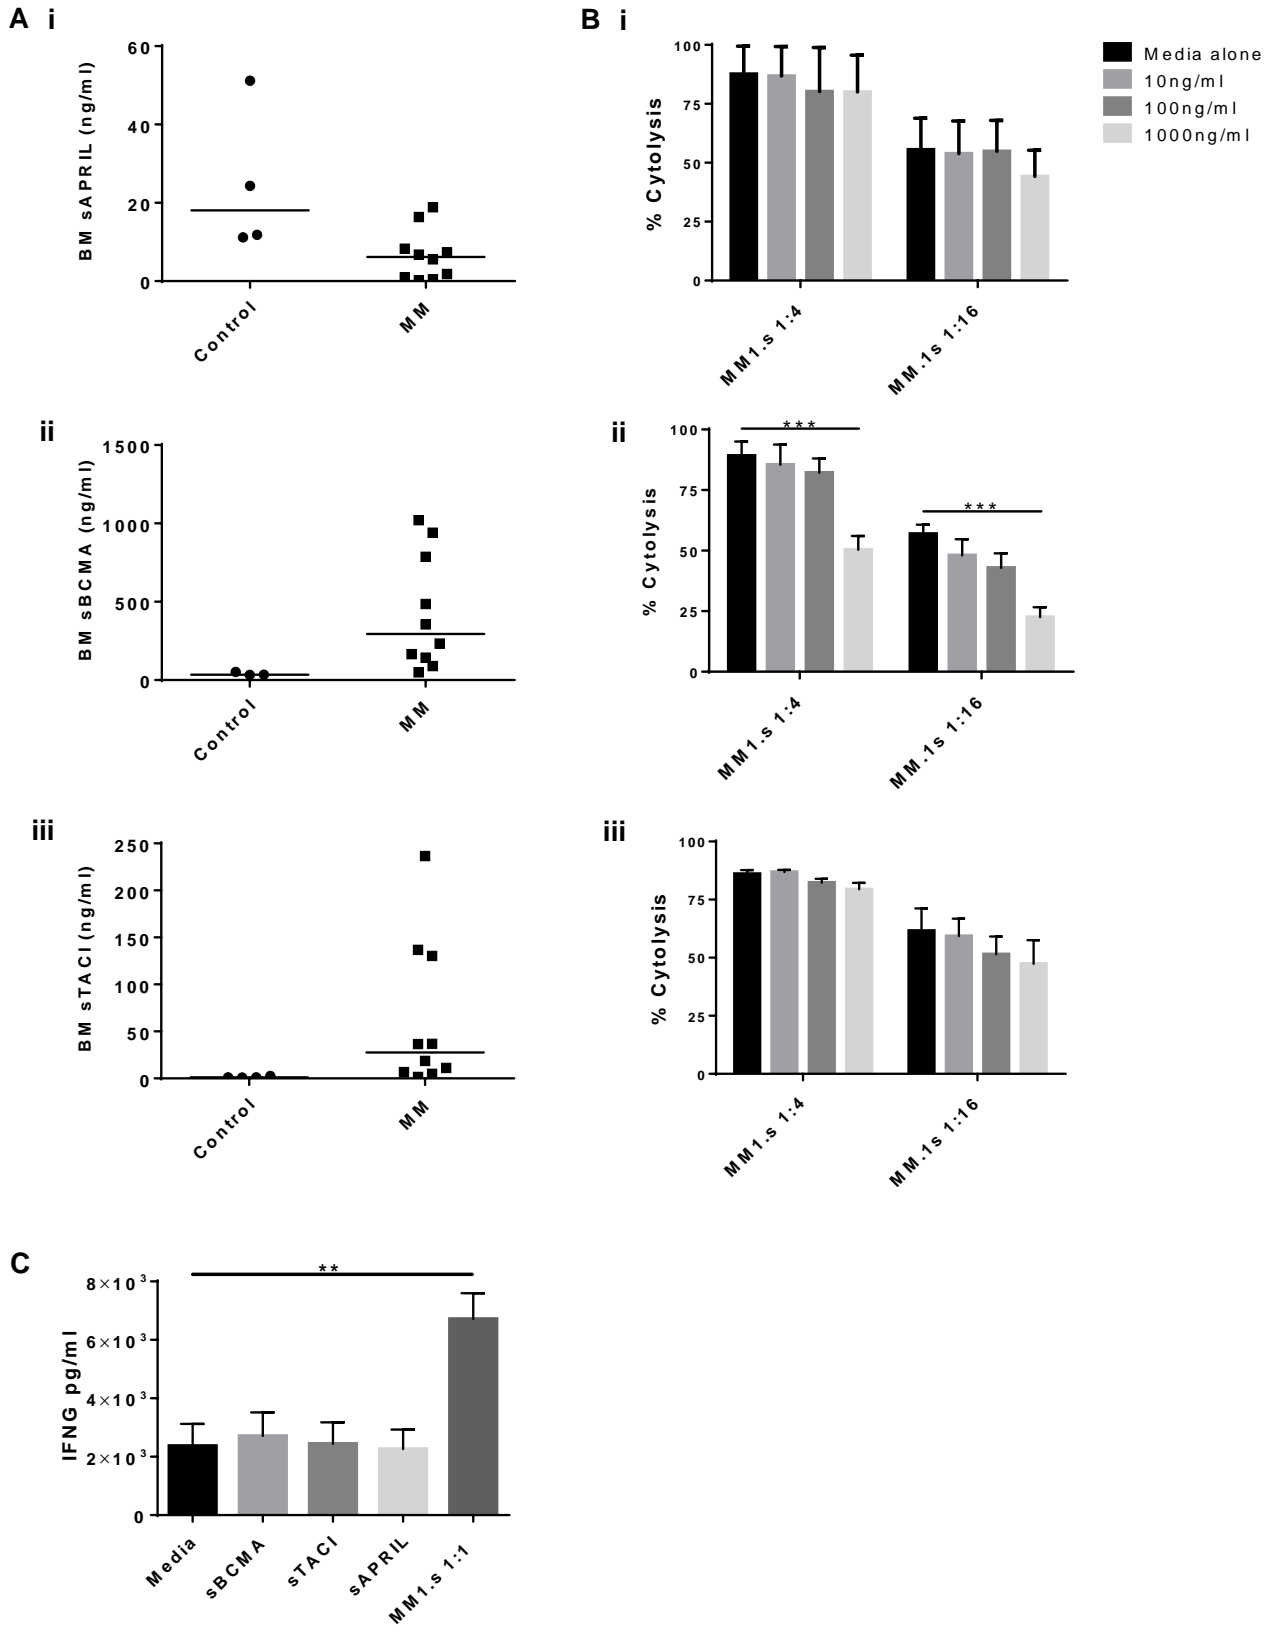

Figure S7

A

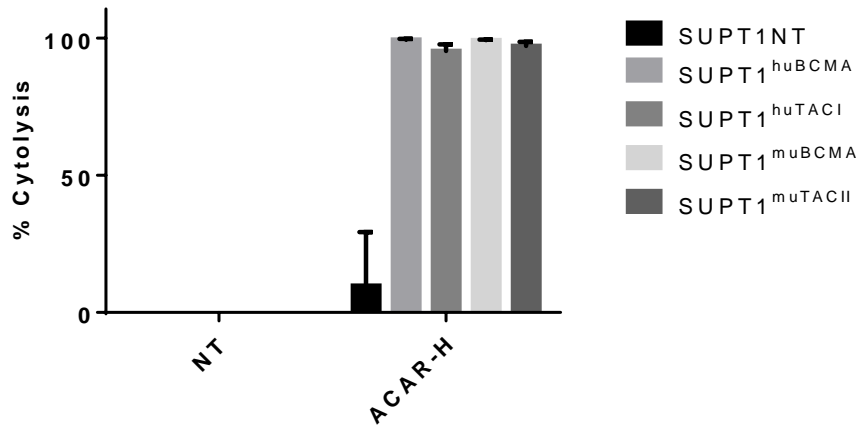

B

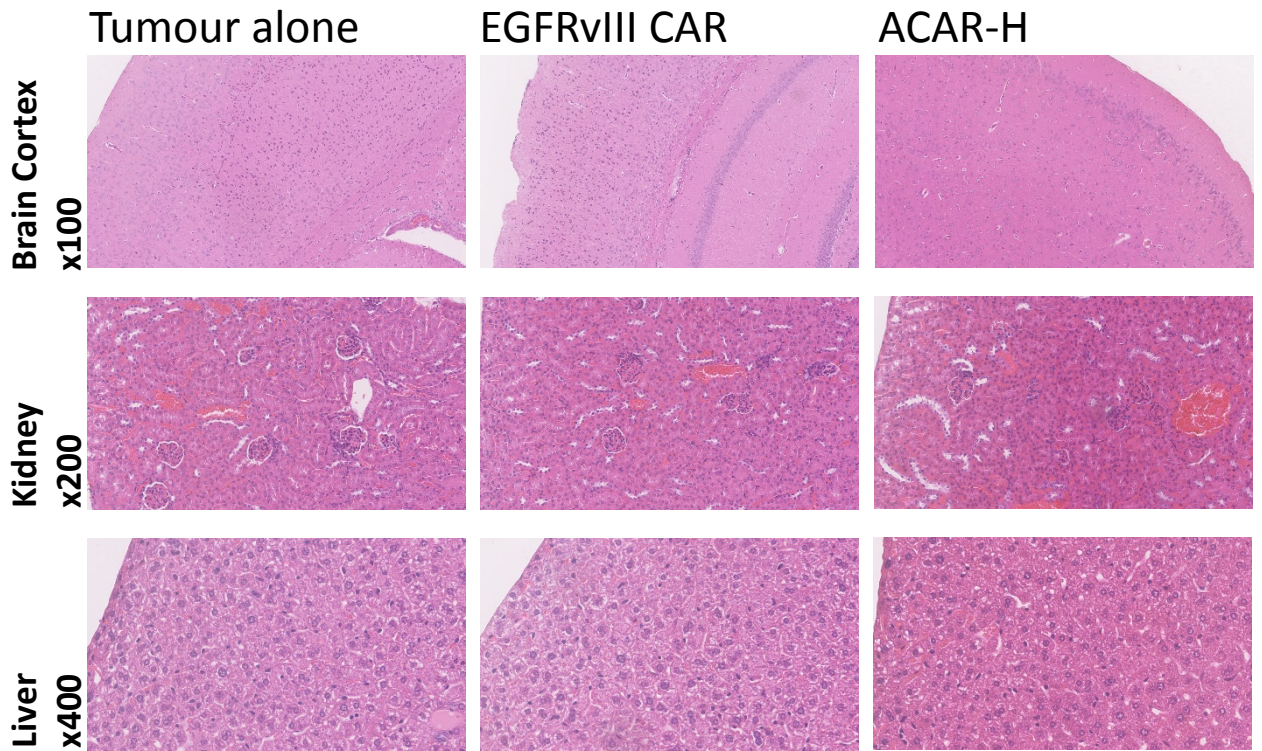

Figure S7B cont'd

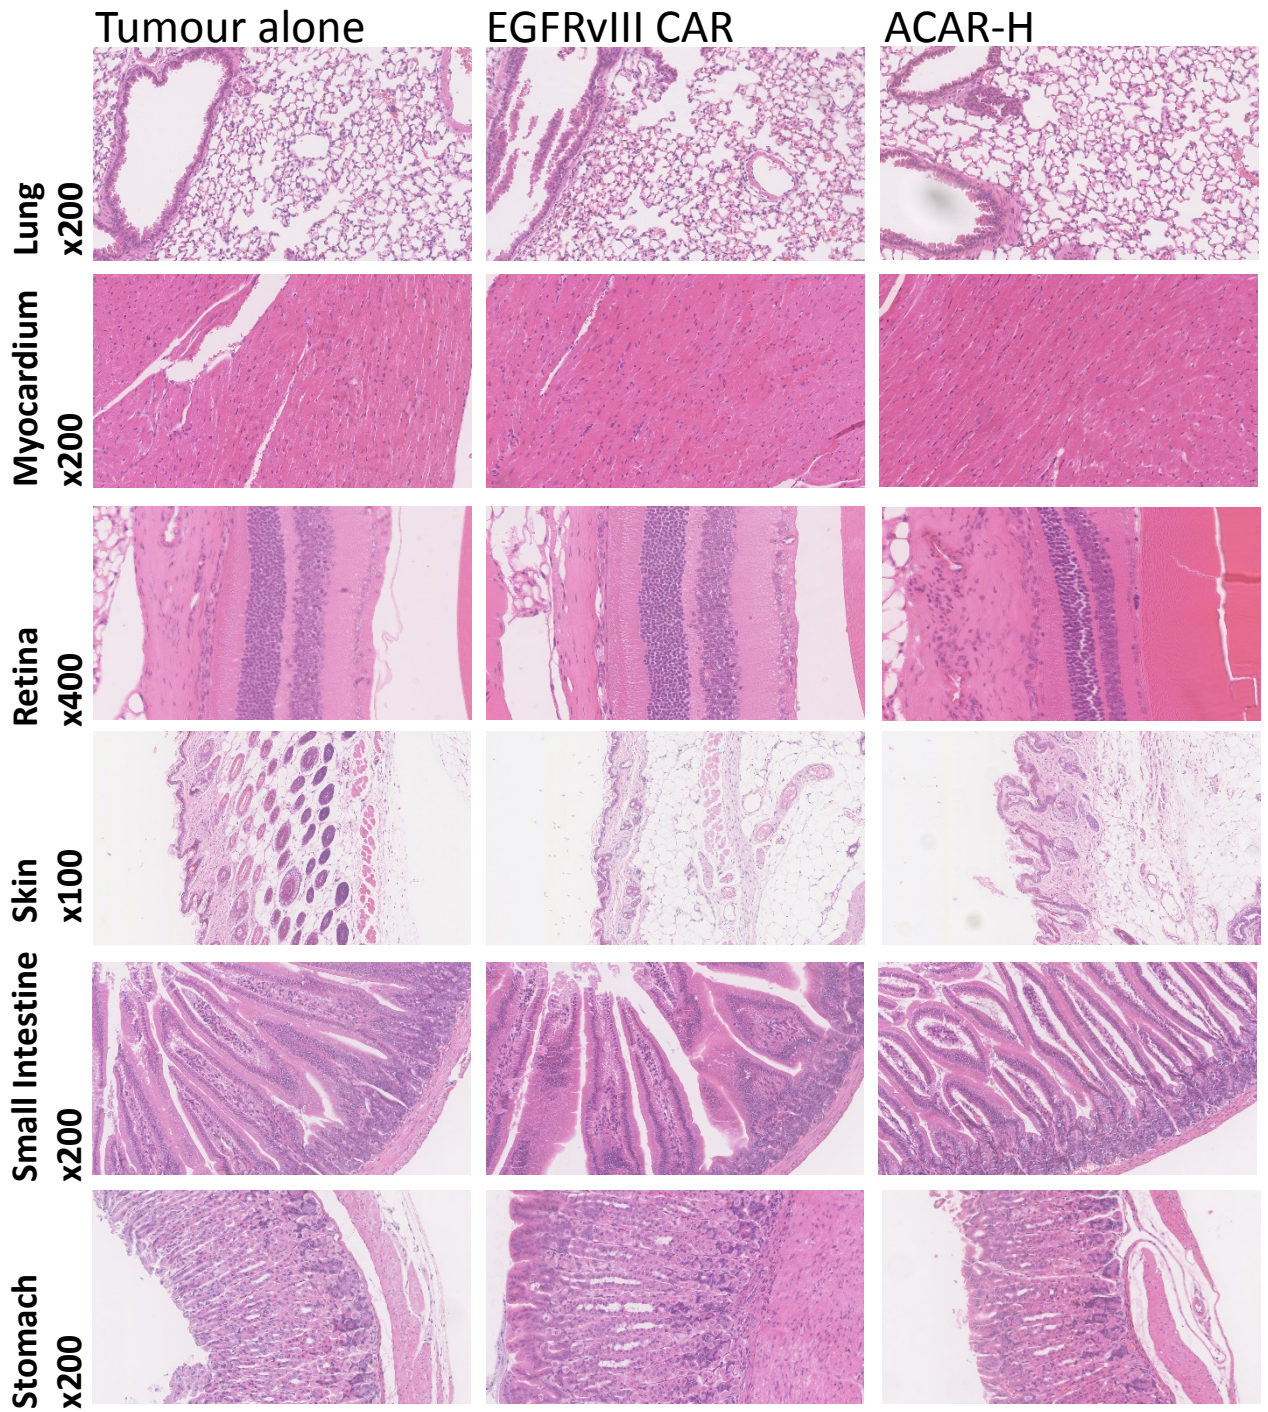

Figure S8

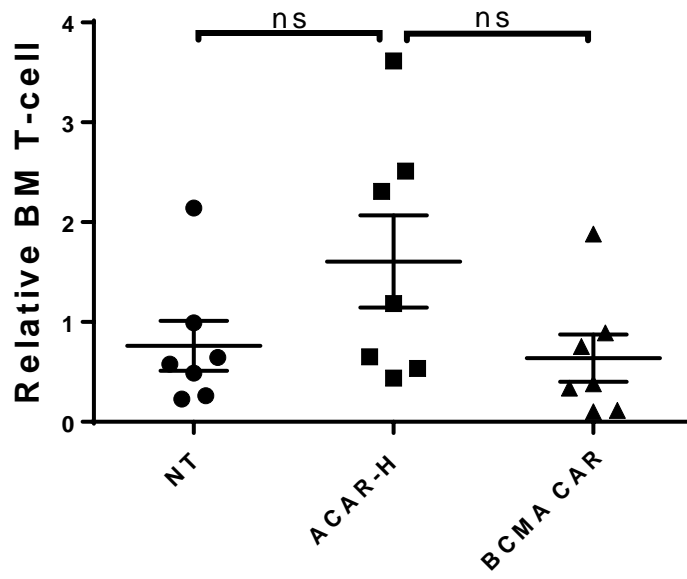

Supplement: blood781351-suppl1.pdf [file blood781351-suppl1.pdf]
